# Supplementary material
Source: PubMed Central journal article supplement (PMC6450398)
Supplement: NIHMS977812-supplement-Supplemental_figure.pdf [file NIHMS977812-supplement-Supplemental_figure.pdf]

**(A): mrSP-D Peptide coverage**

|                     |                     |                       |                     |                     |
|---------------------|---------------------|-----------------------|---------------------|---------------------|
| M L P F L S M L V L | L V Q P L G N L G A | E M K S L S Q R S V   | P N T C T L V M C S | P T E N G L P G R D |
| G R D G R E G P R G | E K G D P G L P G P | M G L S G L Q G G P T | G P V G P K G E N G | S A G E P G P K G E |
| R G L S G P P G L P | G I P G P A G K E G | P S G K Q G N I G P   | Q G K P G P K G E A | G P K G E V G A P G |
| M Q G S T G A K G S | T G P K G E R G A P | G V Q G A P G N A G   | A A G P A G P A G P | Q G A P G S R G P P |
| G L K G D R G V P G | D R G I K G E S G L | P D S A A L R Q Q M   | E A L K G K L Q R L | E V A F S H Y Q K A |
| A L F P D G R S V G | D K I F R T A D S E | K P F E D A Q E M C   | K Q A G G Q L A S P | R S A T E N A A I Q |
| Q L I T A H N K A A | F L S M T D V G T E | G K F T Y P T G E P   | L V Y S N W A P G E | P N N N G G A E N C |
| V E I F T N G Q W N | D K A C G E Q R L V | I C E F               |                     |                     |

**(B): SVPNTCTLVMCSPTEENGLPGR modifications**

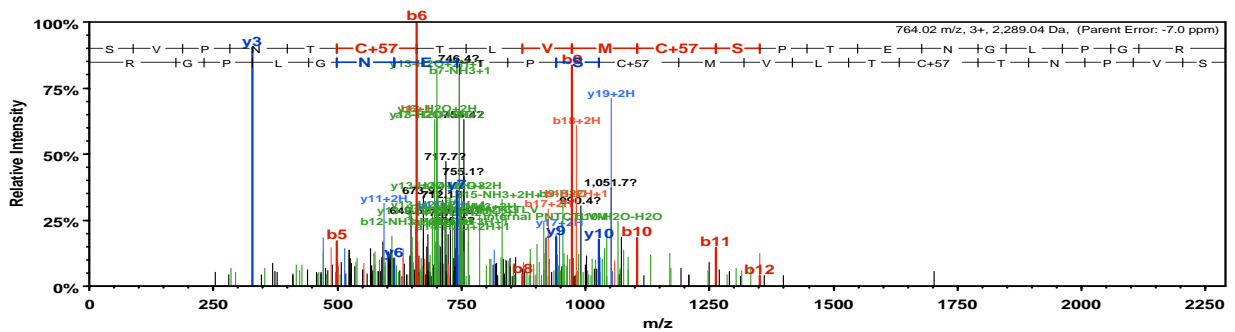

**Supplemental figure 1.**

**Mass spectrometric analysis of ozone exposed rSP-D *in vitro* reveals oxidation of cysteines at 15 and 20 position.** Recombinant mouse SP-D (3µg) was de-glycosylated as described. The de-glycosylated SP-D was trypsinized overnight and then assessed by the TSQ-Vantage mass spectrometer. **(A): rSP-D Peptide coverage in Orbitrap:** 25 exclusive unique peptides, 42 exclusive unique spectra, 114 total spectra, 251/374 amino acids (67% coverage) **(B):** Oxidation of peptide SVPNTCTLVMCSPTEENGLPGR after *in vitro* ozone treatment. Green spikes represent high confidence of identification (>95%). The experiment was run in triplicate.
